# Supplementary material for: Optically-controlled bacterial metabolite for cancer therapy
Source: PubMed Central journal article supplement (PMC5920064; doi:10.1038/s41467-018-03233-9), 2018-04-26
Supplement: 41467_2018_3233_MOESM2_ESM.pdf [file 41467_2018_3233_MOESM2_ESM.pdf]

## **Descriptions of Additional Supplementary Files**

File Name: Supplementary Data 1

Description: Differential proteins in tumors after PMT treatment
